# Learning 2-in-1: towards integrated EEG-fMRI-neurofeedback

Lorraine Perronnet<sup>\*</sup>, Anatole Lécuyer<sup>\*</sup>, Marsel Mano<sup>\*</sup>, Maureen Clerc<sup>\*\*</sup>,  
Fabien Lotte<sup>\*\*\*</sup>, and Christian Barillot<sup>\*</sup>

<sup>\*</sup> Univ Rennes, Inria, CNRS, Inserm, IRISA UMR 6074, Rennes, France

<sup>\*\*</sup> Inria, Athena Project Team, Sophia Antipolis, France

<sup>\*\*\*</sup> Inria, Potioc Project Team, LaBRI, Bordeaux, France

## Abstract

Neurofeedback (NF) allows to exert self-regulation over specific aspects of one's own brain function by returning information extracted in real-time from brain activity measures. These measures are usually acquired from a single modality, most commonly EEG or fMRI. EEG-fMRI-neurofeedback (EEG-fMRI-NF) is a new NF approach that consists of providing a NF based simultaneously on EEG and fMRI. By exploiting the complementarity of these two modalities, EEG-fMRI-NF opens a spectrum of possibilities for defining bimodal NF targets that could be more ro-bust, flexible and effective than unimodal ones. However facing a greater amount of information, the question arises of how to represent the EEG and fMRI features simultaneously in order to allow the subject to achieve better self-regulation. In this work, we propose that the EEG and fMRI features should be represented in a single bimodal feedback, which we refer to as integrated feedback. We then introduce two integrated feedback strategies for EEG-fMRI-NF and compare their early effects on a motor imagery task with a between-group design. The first group (BI DIM, n=10) was shown a *two-dimensional* (2D) feedback in which each dimension depicted the information from one modality. The second group (UNI DIM, n=10) was shown a *one-dimensional* (1D) feedback that integrated both types of information even further by merging them into one. Online fMRI activations were significantly higher in the UNI DIM group than in the BI DIM group, which suggests that the 1D feedback is easier to control than the 2D feedback. However when looking at posthoc activation levels, the difference of fMRI activation levels between the NF runs and the preliminary motor imagery run without NF was more significant in the 2D group. Moreover, subjects from the BI DIM group produced more specific BOLD activations with a notably stronger activation in the right superior parietal lobule (BI DIM > UNI DIM,  $p < 0.001$ , uncorrected). These results suggest that the 2D feedback encourages subjects to explore their strategies to recruit more specific brain patterns. To summarize, our study shows that 1D and 2D integrated feedbacks are effective but also appear to be complementary and could therefore be used in combination in a bimodal NF training program. Altogether, our study paves the way to novel integrated feedback strategies for the development of flexible and effective bimodal NF paradigms making the most of the bimodal information and better suited to clinical applications.

# 1 Introduction

Neurofeedback is the process of feeding back real-time information to an individual about his/her ongoing brain activity so that he/she can learn to control some aspects of it, hopefully resulting in functional (behavioral, physical, cognitive, emotional) improvements (Arns et al., 2017; Sitaram et al., 2016; Sulzer et al., 2013; Thibault, Lifshitz, Birbaumer, et al., 2015). NF has been investigated for a host of clinical (Birbaumer, Ramos Murguialday, et al., 2009) and non clinical applications (Arns et al., 2017; Gruzelier, 2014; Sitaram et al., 2016; Sulzer et al., 2013; Thibault, Lifshitz, Birbaumer, et al., 2015; Thibault, Lifshitz, and Raz, 2016). However its effective deployment in the clinical armamentarium is being held back by the debated evidence about its efficiency, most likely as a result of poor study design and lack of established guidelines and knowledge about the underlying mechanisms of NF (Perronnet, Lécuyer, Lotte, et al., 2016; Thibault, Lifshitz, and Raz, 2016). In recent years, this situation has started to change as increasingly rigorous approaches are becoming the new standard (Stoeckel et al., 2014; Sulzer et al., 2013; Thibault, Lifshitz, and Raz, 2016), and as new studies are delving into the mechanisms (Birbaumer, Ruiz, and Sitaram, 2013; Emmert, Kopel, Sulzer, et al., 2016; Kober, Witte, et al., 2013; Ninaus et al., 2013; Sitaram et al., 2016) as well as the methodological aspects of NF (Emmert, Kopel, Koush, et al., 2017; Krause et al., 2017; Sepulveda et al., 2016; Sorger et al., 2016). However another reason for the debated efficiency of current approaches might be the inherent limitations of single imaging modalities (Biessmann et al., 2011; Fazli, Dahne, et al., 2015). Indeed, most NF approaches rely on the use of a single brain imaging modality such as EEG (Hammond, 2011), fMRI (Sulzer et al., 2013), functional near infra-red spectroscopy (fNIRS) (Kober, Wood, et al., 2014; Mihara et al., 2012) or magnetoencephalography (Buch et al., 2008; Lal et al., 2005; Sudre et al., 2011). Each of these modalities is sensitive to a particular biophysical phenomenon related to the brain activity and comes with technical and physiological limitations (Biessmann et al., 2011). NF studies often report a significant proportion of subjects (usually about 30%) that are not able to self-regulate, (Alkoby et al., 2017). In the brain-computer-interface (BCI) community this phenomenon is known as BCI-deficiency and might originate from non optimal features, flaws from the design (Chavarriaga et al., 2016; Lotte, Larrue, and Mühl, 2013), but also from anatomo-physiological factors that would make some subjects less responsive to certain modalities (Zich et al., 2015). EEG is the most popular NF modality for it is unexpensive and benefits from millisecond temporal resolution. However, its spatial resolution is limited by volume conduction of the head and the number of electrodes. Also source localization from EEG is inaccurate because of the ill-posed inverse problem (Baillet, Mosher, and Leahy, 2001; Grech et al., 2008). fMRI is being increasingly used for NF as it allows to regulate even deeper brain regions with high spatial resolution (Sulzer et al., 2013). However its temporal resolution is limited by the time required to acquire one brain volume (hundreds of milliseconds), and the fact that the hemodynamic response peak is delayed of 4-6s from the neuronal onset and that it acts like a low-pass filter that smears out the neuronal response.

Bimodal EEG-fMRI-neurofeedback (EEG-fMRI-NF) is a new neurofeedback (NF) approach that consists of using information coming simultaneously from EEG and fMRI in real-time to allow the subject to regulate electrophysiological and hemodynamic activities of their brain at the same time (Zotев et al., 2014). The feasibility of this approach was demonstrated by Zotев et al. who hypothesized that it could be more efficient than the unimodal approaches (*ibid.*). Bimodal EEG-fMRI-NF was compared against unimodal

EEG-NF and fMRI-NF in a recent study (Perronnet, Lécuyer, Mano, et al., 2017). This study suggested that EEG-fMRI-NF could indeed be more specific or more engaging than EEG-NF as demonstrated by higher BOLD activations during EEG-fMRI-NF than during EEG-NF. It also highlighted that during bimodal EEG-fMRI-NF subjects could happen to regulate more one modality than the other suggesting the existence of specific mechanisms involved when learning to regulate simultaneously hemodynamic and electrophysiological aspects of the brain activity.

EEG and fMRI share mutual information yet also contain important distinct features. However their degree of overlap is hard to predict. In the context of NF, the information coming from EEG and fMRI could therefore benefit from being integrated in order to be used as an efficient feedback. Yet integrating EEG and fMRI data is a real challenge (Biessmann et al., 2011; Fazli, Dahne, et al., 2015; Jorge, Van der Zwaag, and Figueiredo, 2014; Lahat, Adali, and Jutten, 2015). Multimodal data integration methods are categorized as asymmetrical (EEG-informed fMRI, fMRI-informed EEG) and symmetrical (data fusion, model-driven or data-driven) (Biessmann et al., 2011; Jorge, Van der Zwaag, and Figueiredo, 2014; Lahat, Adali, and Jutten, 2015). For NF purpose the integration method should be applicable in real-time. As illustrated by Figure 1, the integration of multimodal data can theoretically be made at different levels: the raw measures level, the features level (high level or multivariate), the NF signal level or the feedback level (Fazli, Dahne, et al., 2015). It is also possible not to integrate EEG and fMRI data and simply show them as two separate feedbacks but we argue that this might be sub-optimal (see below). Integrating EEG and fMRI at the measures level in real-time does not seem feasible due to the considerable amount of information that it would represent. In hybrid BCI, output of different classifiers are usually passed to a meta-classifier (Fazli, Dahne, et al., 2015; Fazli, Mehnert, et al., 2012). In NF it is less common to use a classifier (Huster et al., 2014) and the feature often directly constitutes the NF signal. We argue that for EEG-fMRI-NF, EEG and fMRI integration can be done directly at the feedback level and that this already has strong implication.

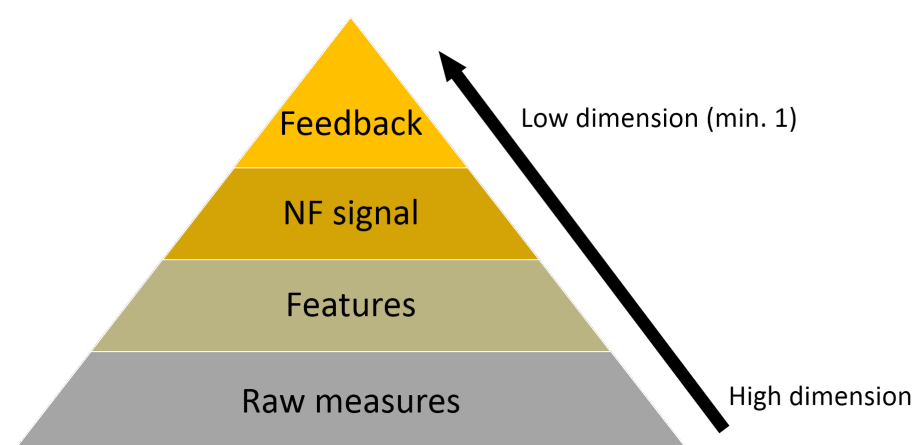

Figure 1: Possible levels of integration of EEG and fMRI information

A few unimodal NF/BCI studies have investigated the effects of feedback presentation (Darvishi et al., 2017; Jeunet, Vi, et al., 2015; Kaufmann and Williamson, 2011; Krause et al., 2017; Ono et al., 2014; Sollfrank et al., 2016; Stoeckel et al., 2014) which is a central issue in NF/BCI design. In the case of bimodal NF, feedback design might be even more critical as there is more information to display and as the EEG and fMRI bits of information have different spatio-temporal dynamic properties. To our knowledge, no previous

work has addressed the question of how to represent the EEG and fMRI information simultaneously and how the bimodal representation would affect NF performance.

In their pioneering work Zotev et al. naturally extended the classical thermometer feedback to bimodal NF by juxtaposing two feedback gauges, one for EEG and one for fMRI (Zotев et al., 2014). Though this has the advantage of clearly and fully representing both features, this could suffer from a few drawbacks. Firstly, it might be suboptimal in term of cognitive load (Gaume et al., 2016; Sweller, Merrienboer, and Paas, 1998) because the subject has to concentrate on two gauges. Secondly, the fact that the representations of both signals are separated seem to imply that there are two targets to reach. Therefore the regulation task might be perceived by the subject as two simultaneous regulation tasks instead of one. Thirdly, it can be misleading when the subject tries to interpret how both features evolve in time, especially when they exhibit inconsistencies. Lastly, it does not fully exploit the possibility of using a NF target defined by the state of both features.

In contrast to representing the EEG and fMRI features with two separate feedbacks, we propose that both features could be represented in an *integrated* feedback: that is a single feedback having a single NF target characterized by the state of both features. This type of feedback has the advantage of encouraging the subject to perceive the bimodal NF task as a single self-regulation task and offers great flexibility in the definition of bimodal NF targets. In this study, we introduce two integrated feedback strategies (illustrated in figure Figure 2) and compare their early effects on an EEG-fMRI-NF guided motor-imagery task with a between-group design in order to evaluate which strategy is better than the other on a single EEG-fMRI-NF session. The first integrated feedback strategy is a *two-dimensional* (2D) plot in which each dimension depicts the information from one modality. The second integrated feedback strategy is a *one-dimensional* (1D) gauge that merges both information into one and therefore has a higher degree of integration than the 2D feedback. The performance of each strategy is evaluated in terms of sensitivity (activation level) and spatial specificity of the motor-imagery related EEG and fMRI activations.

## 2 Material and methods

The study was conducted at the Neurinfo platform (CHU Pontchaillou, Rennes, France) and was approved by the Institutional Review Board. Twenty right-handed NF-naive healthy volunteers with no prior MI-NF experience (mean age:  $35 \pm 10.6$  years, 10 females) participated in the study. Participants were randomly assigned to the bi-dimensional (BI\_DIM; mean age:  $37 \pm 14$  years, 5 females) or to the uni-dimensional (UNI\_DIM; mean age:  $33 \pm 6.2$  years, 5 females) group. Throughout the whole experiment, the participants were lying down in the MR bore and wearing a 64 channel MR-compatible EEG cap.

### 2.1 Hypotheses

Figure 2 illustrates the separate feedback (following Zotev et al., 2014) as well as the integrated 2D and 1D feedback strategies and summarizes their potential advantages and drawbacks. Our integrated 2D feedback consists of a ball moving on a 2D diamond-shape plot, the left dimension representing the EEG feature and the right dimension representing the fMRI feature. This type of feedback was introduced in our previous work (Perronnet, Lécuyer, Mano, et al., 2017) and we propose here an upgraded version

in which the plot background delineates regions that indicate preferred direction of effort, encouraging the subject to regulate EEG and fMRI equitably. Our integrated 1D feedback consists of a ball moving in a gauge, the ball position representing the average of the EEG and fMRI features. The background of the 1D gauge is splitted in four regions to give the subject reference points. Interestingly, the separate feedback and the integrated 2D feedback strategies share common advantages and drawbacks because they both map the bimodal information onto two dimensions. On the good side, they fully represent the EEG and fMRI features and allow to discriminate between both, but as a counterpart the difference of update rates is perceivable and inconsistencies between the two features can be misleading. The integrated 2D feedback is visually more optimal than the separate feedback as subjects only need to look at a single representation. However it might be complex to apprehend as the subjects need to understand how the ball travels in the 2D space. Subjects would therefore probably need more time to get used to this feedback. But the information it conveys is highly meaningful regarding how the subject is regulating both features at the same time. When the ball is on one side it means that the subject is controlling more one feature than the other, but when the ball is on the diagonal it means that the subject is controlling both features equally. The integrated 1D feedback has the advantage of being simpler to comprehend but as a counterpart it is less informative than the two other strategies.

## 2.2 Experimental protocol

After signing an informed consent form describing the MR environment, the participants were verbally informed about the goal of both the study and the protocol. They were instructed that during the NF runs, they would be presented with a ball moving in two dimensions (for the BLDIM group) or in a one-dimensional gauge (for the UNIDIM group) according to the activity in their motor regions as measured with EEG and fMRI (see Figure 2). Participants were told that they would have to bring the ball closer to the darker blue areas by imagining clenching their right-hand. This instruction was reminded in written form on the screen at the beginning of each NF run. More specifically we explained the participants that they would need to perform kinesthetic motor imagery (kMI)(Neuper et al., 2005) of their right-hand in order to control the ball. Kinesthetic motor imagery was defined as trying to feel the sensation of the motion rather than only visualizing it. Participants were informed about the nature of EEG and fMRI signal, and specifically about the 4-6 seconds delay of the hemodynamic response. Additionally, for participants in the BLDIM group, we explained them that EEG was represented on the left axis while fMRI was represented on the right axis. This implied that when the ball would be on the left side, it would mean that they are controlling more EEG than fMRI, and on the opposite when the ball would be on the right side it would mean that they are controlling fMRI more than EEG. We told them that they should try to control both dimensions, i.e. try to move the ball near the diagonal. These instructions were given verbally at the beginning of the experiment and reminded later if the participant asked for it. Participants were asked not to move at all, especially during the course of a run. Video monitoring of the inside of the MR tube allowed to check for whole-body movements of the participant.

After receiving the instructions and having the EEG cap setup on his/her scalp, the participant was installed in the MR tube where we made sure the electrodes impedances one last time in the supine position. The experimental protocol then consisted of: a



|                   | <i>No integration</i>                                                                                                                                                                   |                                                                                                                     | <i>Full integration</i>                                                                                                                       |
|-------------------|-----------------------------------------------------------------------------------------------------------------------------------------------------------------------------------------|---------------------------------------------------------------------------------------------------------------------|-----------------------------------------------------------------------------------------------------------------------------------------------|
| Feedback strategy | <b>Separate feedbacks</b><br>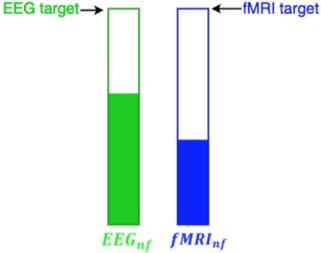                                                                          | <b>Integrated 2D feedback</b><br> | <b>Integrated 1D feedback</b><br>                          |
| Pros              | <ul style="list-style-type: none"> <li>• Simple representation</li> </ul>                                                                                                               |                                                                                                                     | <ul style="list-style-type: none"> <li>• 1 feedback / 1 target ~ 1 regulation task</li> <li>• Allows to define a bimodal NF target</li> </ul> |
|                   | <ul style="list-style-type: none"> <li>• Allows to discriminate between EEG and fMRI</li> <li>• Fully represents both features</li> </ul>                                               |                                                                                                                     | <ul style="list-style-type: none"> <li>• Simple representation</li> </ul>                                                                     |
| Cons              | <ul style="list-style-type: none"> <li>• Difference of EEG and fMRI update rates is perceivable</li> <li>• Inconsistencies can be misleading</li> </ul>                                 |                                                                                                                     | <ul style="list-style-type: none"> <li>• Does not allow to discriminate between EEG and fMRI</li> </ul>                                       |
|                   | <ul style="list-style-type: none"> <li>• High cognitive load</li> <li>• 2 feedbacks / 2 targets ~ 2 regulation tasks</li> <li>• Does not allow to define a bimodal NF target</li> </ul> |                                                                                                                     | <ul style="list-style-type: none"> <li>• Complex representation</li> </ul>                                                                    |

Figure 2: Summary of potential advantages and drawbacks of different bimodal feedback strategies: separate, integrated 2D, integrated 1D. As opposed to the separate feedback strategy proposed by pioneer authors in Zotev et al., 2014, we introduce two novel integrated feedback strategies for bimodal EEG-fMRI-NF. The integrated 2D feedback consists of a ball moving in two dimensions, the left dimension representing the EEG feature and the right dimension representing the fMRI feature. Subjects in the BI\_DIM group are shown the integrated 2D feedback. The integrated 1D feedback consists of a ball moving in one dimension, the ball position representing the average of the EEG and the fMRI features. Subjects in the UNI\_DIM group are shown the integrated 1D feedback. NB: in this study, we compare the integrated 2D and the integrated 1D strategies, however we do not evaluate integrated feedback strategies against the separate feedback strategy.

structural 3D T1 ; a preliminary MI run without NF (MI\_pre), the data of which was used to calibrate the NF target (see subsection 2.5); three NF runs with a one minute break in between each ; a post MI run without NF (MI\_post). The five EEG-fMRI functional runs employed a block-design alternating 8 times 20s of rest and 20s of task (see Figure 3).

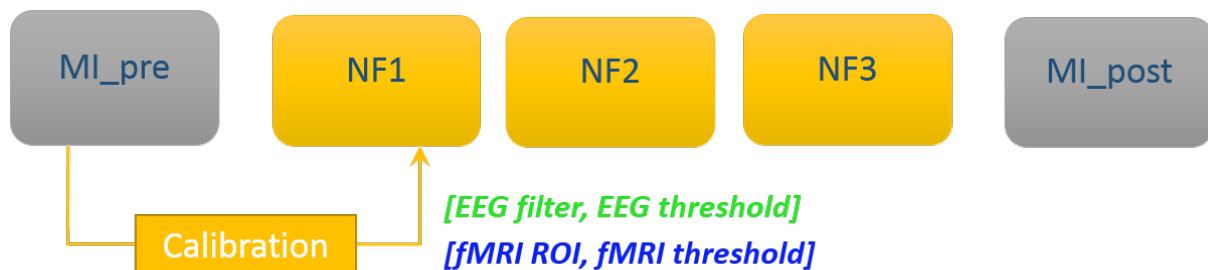

Figure 3: The experimental protocol consisted of 5 EEG-fMRI runs: a preliminary motor imagery run without NF (MI\_pre) used for calibration, three NF runs (NF1, NF2, NF3), and a post motor imagery run without NF (MI\_post). Each run consisted of a block design alternating 8 times 20s of rest and 20s of task.

During rest, the screen displayed a white cross and participants were asked to concentrate on the cross and not on the passed or upcoming task block. During task, the screen displayed the cue "Imagine right" as well as the feedback during NF runs. The feedback consisted of a yellow ball moving in a two-dimensional plot for the BI\_DIM group or in a one-dimensional gauge for the UNI\_DIM group. The participants were instructed to bring the ball closer to the darker blue area by performing kinesthetic motor imagery of their right hand clenching. The EEG feature was defined as the event-related desynchronization (ERD) (Pfurtscheller and Lopes da Silva, 1999) in the [8-30Hz] band of the EEG data filtered with a subject specific spatial filter (see Section 2.5 and 2.4) and was updated every 250ms. The fMRI feature was defined as the mean BOLD in a subject-specific motor region-of-interest (ROI) (see Section 2.5 and 2.4) and was updated at every repetition time (TR=1s). For the UNI\_DIM group, the ball position was the average of the EEG and fMRI features ( $EEG_{nf} + fMRI_{nf}$ )/2. For the BI\_DIM group, the right axis depicted the normalized fMRI feature while the left axis depicted the normalized EEG feature. At the end of the experiment, the participants were asked to fill out a questionnaire about their perceived performance, motivation, fatigue, interest and difficulty in performing the NF task. Figure 3 illustrates the experimental protocol.

## 2.3 Data acquisition

EEG and fMRI data were simultaneously acquired with a 64-channel MR-compatible EEG solution from Brain Products (Brain Products GmbH, Gilching, Germany) and a 3T Verio Siemens scanner (VB17) with a 12 channel head coil. Foam pads were used to restrict head motion. EEG data was sampled at 5kHz with FCz as the reference electrode and AFz as the ground electrode. fMRI acquisitions were performed using echo-planar imaging (EPI) with the following parameters: repetition time (TR) / echo time (TE) = 1000/23ms, FOV =  $210 \times 210 mm^2$ , voxel size =  $2 \times 2 \times 4 mm^3$ , matrix size =  $105 \times 105$ , 16 slices, flip angle =  $90^\circ$ . Visual instructions and feedback were transmitted using the NordicNeuroLab hardware and presented to the participant via an LCD screen and a rear-facing mirror fixed on the coil. As a structural reference for the fMRI analysis, a high resolution 3D T1 MPRAGE sequence was acquired with the following parameters: TR/TI/TE = 1900/900/2.26ms, GRAPPA 2, FOV =  $256 \times 256 mm^2$  and 176 slabs, voxel size =  $1 \times 1 \times 1 mm^3$ , flip angle =  $90^\circ$ . Our multimodal EEG/fMRI-NF system (Mano et al. 2017) integrates EEG and fMRI data streams via a TCP/IP socket. The EEG data is pre-processed with BrainVision Recview (Brain Products GmbH, Gilching, Germany) software for gradient and ballistocardiogram (BCG) artifact correction (see Section 2.4) and sent to Matlab (The MathWorks, Inc., Natick, Massachusetts, United States) for further processing. The fMRI data is pre-processed online for slice-time correction and motion correction with custom Matlab code adapted from SPM8 (FIL, Wellcome Trust Centre for Neuroimaging, UCL, London, UK). EEG and fMRI NF features are then computed and translated as feedback with Psychtoolbox (Kleiner et al., 2007).

## 2.4 Real-time data processing

During NF runs, online gradient artifact correction and BCG correction of the EEG data were done in BrainVision Recview (Brain Products GmbH, Gilching, Germany) software. The gradient artifact correction in Recview is based on the average artifact subtraction (AAS) method (Allen, Josephs, and Turner, 2000). At the beginning and throughout the

length of each experiment, we checked that the signal quality of the ECG channel was good because BCG artifact correction relies on the quality of the ECG channel. We would also reset the template regularly before the start of each run. We used an artifact subtraction template of 2000ms and 4 templates for template drift correction. The data was then down-sampled to 200Hz and low pass filtered at 50 Hz (48 db slope) with a Butterworth filter. The data were subsequently corrected for BCG artifact (Allen, Polizzi, et al., 1998). The pulse model was searched in the first 15 seconds of the data. The pulse detection was based on a moving template matching approach with minimal pulse period of 800ms, minimum correlation threshold of 0.7, and amplitude ratio range from 0.6 to 1.2 relative to the pulse model. For pulse correction, a moving template was computed by averaging the 10 previously detected pulses, and the correction was done on a window length of [-100ms, 700ms] relatively to the R-peak. This corrected data was then sent to Matlab for feature extraction. The corrected data was filtered with the subject specific spatial filter *FILT* computed during the calibration phase (see Section 2.5). The band power in the [8-30Hz] band was then computed on this filtered data using the periodogram and a 2s window size, and it was normalized with the following ERD-like (Pfurtscheller and Lopes da Silva, 1999) formulae:  $EEG_{nf}(t) = reverse \times \frac{bp(\text{prev\_rest}) - bp(t)}{bp(\text{prev\_rest})}$  where  $bp(t)$  is the power at time  $t$ ,  $bp(\text{prev\_rest})$  is the average power over the previous rest block (values between the fourteen and the nineteen seconds) and  $reverse = 1$  if the selected filter  $FILT = f_{rest > task}$  or the default filter (laplacian around C3), or  $reverse = -1$  otherwise. Finally, the EEG feature was smoothed over the last four values, divided by  $EEG_{thresh}$  (see subsection 2.5) and translated as visual feedback every 250ms.

$$EEG_{nf}(t) = reverse \times \frac{bp(\text{prev\_rest}) - bp(t)}{bp(\text{prev\_rest})}$$

$$fMRI_{nf}(v) = \frac{B_{roi}(v)}{B_{roi}(\text{prev\_rest})} - \frac{B_{bg}(v)}{B_{bg}(\text{prev\_rest})}$$

The fMRI signal was pre-processed online for motion correction, slice-time correction and then the fMRI NF feature was computed according to the following definition:  $fMRI_{nf}(v) = B_{roi}(v)/B_{roi}(\text{prev\_rest}) - B_{bg}(v)/B_{bg}(\text{prev\_rest})$  where  $B_{roi}(v)$  (respectively  $B_{bg}(v)$ ) is the average BOLD signal in the ROI (respectively in the background (BG)) at volume  $v$ , and  $B_{roi}(\text{prev\_rest})$  (respectively  $B_{bg}(\text{prev\_rest})$ ) is the ROI (respectively BG) baseline obtained by averaging the signal in the ROI (respectively in the BG) from the fourteenth to the nineteenth second (to account for the hemodynamic delay) of the previous rest block. The background was defined as a large slice (slice 6 out of 16) in deeper regions and used to cancel out global changes. Finally the fMRI feature was smoothed over the last three volumes, divided by  $fMRI_{thresh}$  (see subsection 2.5) and translated as visual feedback every 1s.

## 2.5 Calibration phase

In order to define subject-specific NF features, right at the end of the MI\_pre run, the MI\_pre EEG and fMRI data were pre-processed and analyzed to extract a spatial filter *FILT* and a threshold  $EEG_{thresh}$  for the EEG NF feature as well as a BOLD ROI and a threshold  $fMRI_{thresh}$  for the fMRI NF feature.

### 2.5.1 EEG calibration

Right at the end of the MI\_pre run, the MI\_pre data was pre-processed similarly to what was done in real-time (see Section 2.4) except that the BCG correction was done semi-



automatically. Using the Common Spatial Pattern (CSP) method (Ramoser, Müller-Gerking, and Pfurtscheller, 2000), we then computed the pairs of spatial filters that best maximized the difference in [8-30Hz] power between rest and task blocks on 18 channels located over the motor regions (C3, C4, FC1, FC2, CP1, CP2, FC5, FC6, CP5, CP6, C1, C2, FC3, FC4, CP3, CP4, C5, C6). The first filter  $f_{rest>task}$  of the pair maximizes the power during the rest blocks while the second filter  $f_{task>rest}$  of the pair maximizes the power during the task blocks. If the eigenvalue of  $f_{rest>task}$  was greater than the inverse of the eigenvalue of  $f_{task>rest}$  (Blankertz et al., 2008), then the subject-specific filter *FILT* was set to  $f_{rest>task}$ , otherwise it was set to  $f_{task>rest}$ . In case the CSP filter did not look satisfactory (visual inspection to see if the MI\_pre data filtered was correlated with the task), we used a laplacien filter over C3 instead (Nunez et al., 1997). The ERD feature was then computed (see Section 2.4) and the threshold for the EEG NF was set by computing the ERD threshold that was reached at least 30% of the time.

### 2.5.2 fMRI calibration

MI\_pre fMRI data was pre-processed for slice-time correction, spatial realignment and spatial smoothing with a 6mm Gaussian kernel with SPM8. A first-level general linear model (GLM) analysis modeling the task and the rest was then performed. The fMRI ROI was defined by taking a  $9 \times 9 \times 3$  box around the maximum of activation (constrained to the left motor area) of the thresholded T-map ( $task > rest$ ,  $p < 0.001$ ,  $k > 10$ ). The fMRI feature was then computed on this MI\_pre data (see Section 2.4) and the threshold for the fMRI NF was set by computing the value that was reached at least 30% of the time.

## 2.6 Offline analysis

### 2.6.1 EEG analysis

For offline analysis, EEG signal was pre-processed similarly to what was done in real-time (see Section 2.4) except that the BCG correction was done semi-automatically. For each subject and run, we checked that the R-peaks were well detected by adapting the parameters and by correcting or selecting the R-peaks manually when necessary.

To analyze how the participants regulated their EEG NF feature, we re-computed the ERD values on offline pre-processed data filtered with the online *FILT* as defined in 2.4 except that the baseline was not computed sliding-block-wise, but instead by averaging power values after the first second and before the nineteenth second of all rest blocks. We refer to this feature as "online ERD".

As the amount of calibration data was limited and as participants had no prior MI training, it is possible that the filter from the calibration was suboptimal. Therefore we also extracted the ERD values on data filtered with a posthoc *FILT*. We refer to this feature as "posthoc ERD". The posthoc *FILT* was computed the same way as the online *FILT* (see Section 2.5) except that it was computed on the concatenation of MI\_pre, NF1, NF2 and NF3 instead of MI\_pre only.

For statistical analysis, the ERD values were standardized to z-scores by considering for each subject their mean and standard deviation over MI\_pre, NF1, NF2, NF3, MI\_post. For each run the standardized ERD values were averaged by considering the values between the first and the nineteenth second of all NF blocks but the first. The mean ERD over NF1, NF2 and NF3 was averaged to get the mean NF ERD  $\overline{NF}$ . We

also considered  $\max_i NF_i$  the best mean ERD over the three NF runs. We refer to the best NF run regarding the EEG feature as  $\max NF_{\text{eeg}}$ .

## 2.6.2 fMRI analysis

The fMRI data from each of the five runs (MI\_pre, NF1, NF2, NF3, MI\_post) was pre-processed and analyzed with AutoMRI (Maumet, 2013), a proprietary software for fMRI analysis automation based on SPM8. Pre-processing included slice-time correction, spatial realignment, co-registration to the 3D T1, followed by spatial smoothing with a 8 mm Gaussian kernel. A first-level and second-level general linear model (GLM) analysis was performed. The first-level GLM included the canonical HRF for the task as well as its temporal and dispersion derivatives. For the second-level GLM analysis, the individual data were normalized to the Montreal Neurological Institute (MNI) template and grouped using a mixed effects linear model. The activation maps were corrected for multiple comparisons using Family-Wise error (FWE) correction ( $p < 0.05$  with cluster size  $> 10$  voxels).

To analyze how the participants regulated the BOLD signal in the *online ROI*, we extracted the ROI percent signal change (PSC) on offline pre-processed data. For each participant and each run, the registered fMRI values were high-pass filtered (100 seconds) to remove the linear drift, averaged in the online ROI and transformed into PSC using the formulae  $(B_{\text{roi}}(v) - m)/m$  where  $m$  is the average of  $B_{\text{roi}}$  values from the fourteenth to the nineteenth second. We refer to this feature as "online PSC".

Because NF training affects patterns beyond the one being fed back (Kopel et al., 2016; Wander et al., 2013), the same procedure was done to extract the PSC in a *posthoc ROI* defined by computing individually an average activation map over NF1, NF2 and NF3 and taking a  $9 \times 9 \times 3$  box around the maximum of activation (constrained to the left motor area). We refer to this feature as "posthoc PSC". Finally the PSC values were standardized to z-scores by considering for each subject their mean and standard deviation over MI\_pre, NF1, NF2, NF3, MI\_post. For each run the standardized PSC values were averaged across the last 16 volumes of all NF blocks but the first. The mean PSC over NF1, NF2 and NF3 was averaged to get the mean NF PSC  $\overline{NF}$ . We also considered  $\max_i NF_i$  the best mean PSC over the three NF runs. We refer to the best NF run regarding the fMRI feature as  $\max NF_{\text{fMRI}}$ .

## 2.6.3 Statistical analysis

For each group (UNL DIM/BL DIM), each modality (EEG/fMRI) and level of feature (online/posthoc) we conducted non-parametric Friedman tests of the differences among MI\_pre,  $\overline{NF}$ , MI\_post, as well as Wilcoxon signed-rank tests (signrank Matlab function) between  $\overline{NF}$  and MI\_pre as well as between  $\max_i NF_i$  and MI\_pre with Bonferroni correction (corrected p-value:  $0.05/3$  conditions = 0.0167). For between group comparison we computed a Wilcoxon test (ranksum Matlab function, equivalent to Mann-Whitney U-test) on  $\overline{NF}$ . The tests were done both for the online PSC and for the posthoc PSC.

# 3 Results

GLM analysis of both groups (UNL DIM + BL DIM) revealed activations during NF (see Figure 4) in : bilateral premotor cortex (BA 6) including left and right supplementary

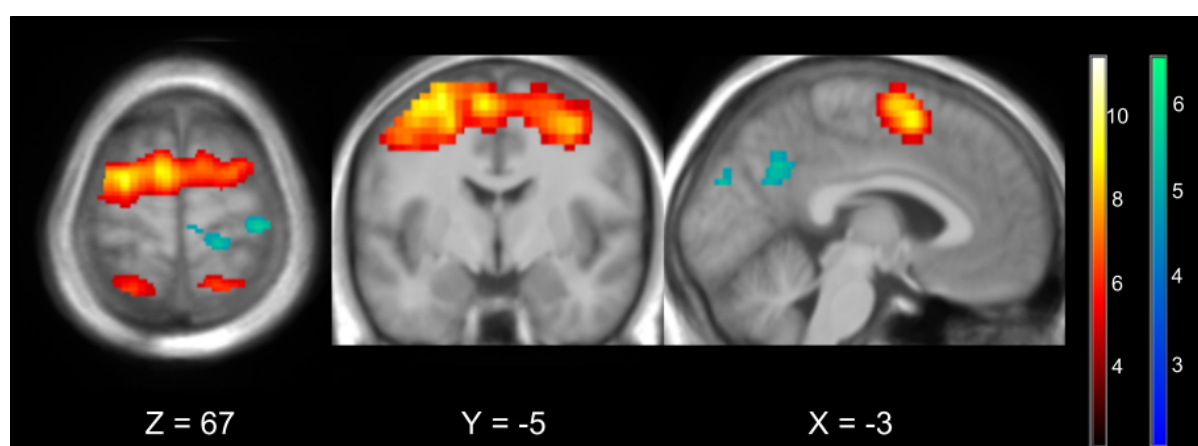

Figure 4: Average activations (in yellow) and deactivations (in blue) over the three NF runs (NF1+NF2+NF3) in both groups (UNI\_DIM + BI\_DIM) thresholded at  $p < 0.05$  FWE corrected

motor area (SMA), left and right inferior frontal gyrus (pars opercularis rolandic operculum) (BA 44), left and right inferior parietal lobule (IPL), left and right superior parietal lobule (SPL), left and right supramarginal lobule/gyrus (BA 40, BA 2, BA 48), left and right superior parietal (BA 7, BA 5), bilateral mid-cingulate cortex, left and right precuneus (BA 7). Deactivations were observed in right primary motor cortex (M1), left and right angular gyrus (BA 39), right cuneus (BA 18), left and right precuneus, left middle occipital (BA 10) and in the left inferior parietal lobule (BA 19).

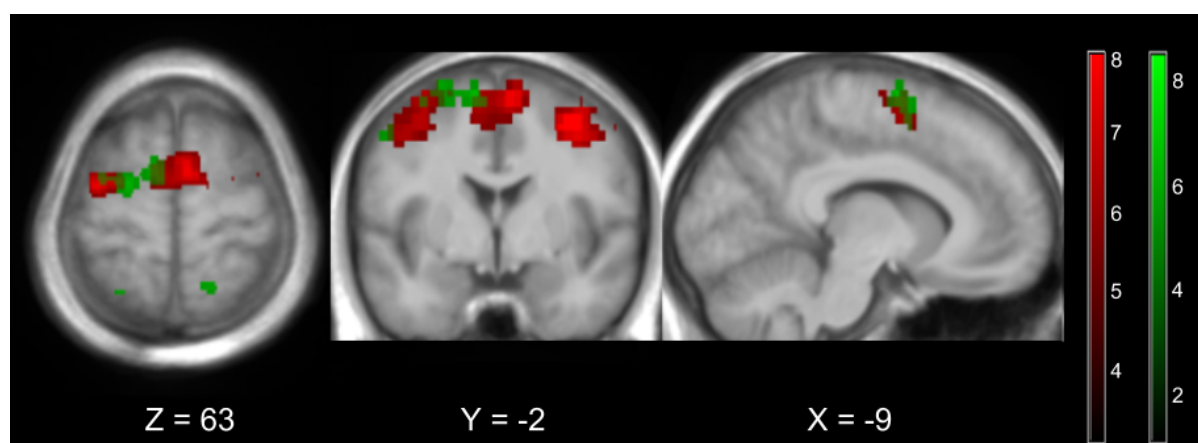

Figure 5: Average activations over the three NF runs (NF1+NF2+NF3) in each group thresholded at  $p < 0.05$  FWE corrected. Activations of the UNI\_DIM group are shown in red. Activations of the BI\_DIM are shown in green, deactivations of the BI\_DIM group are shown in blue. Yellow corresponds to activations common to UNI\_DIM and BI\_DIM

GLM analysis of the BI\_DIM group during NF revealed activations in (figure 5): Left PMC (BA 6) including SMA, left IPL (BA 40), left SPL (BA 7), right SPL (BA 5, BA 7), right superior occipital (BA 7). Deactivations were observed in right M1, (BA 4), left IPL (BA 19). GLM analysis of the UNI\_DIM group during NF revealed activations in (Figure 5): left and right PMC (BA 6) including left and right SMA, left IPL (BA 40), left superior parietal lobule (BA 40), left and right supramarginal lobule (BA 2).

Deactivations were observed in the right angular gyrus (BA 39).

The BI\_DIM group showed more activations ( $p < 0.001$ , uncorrected) than the UNI\_DIM group in the right superior parietal lobule (BA 7).

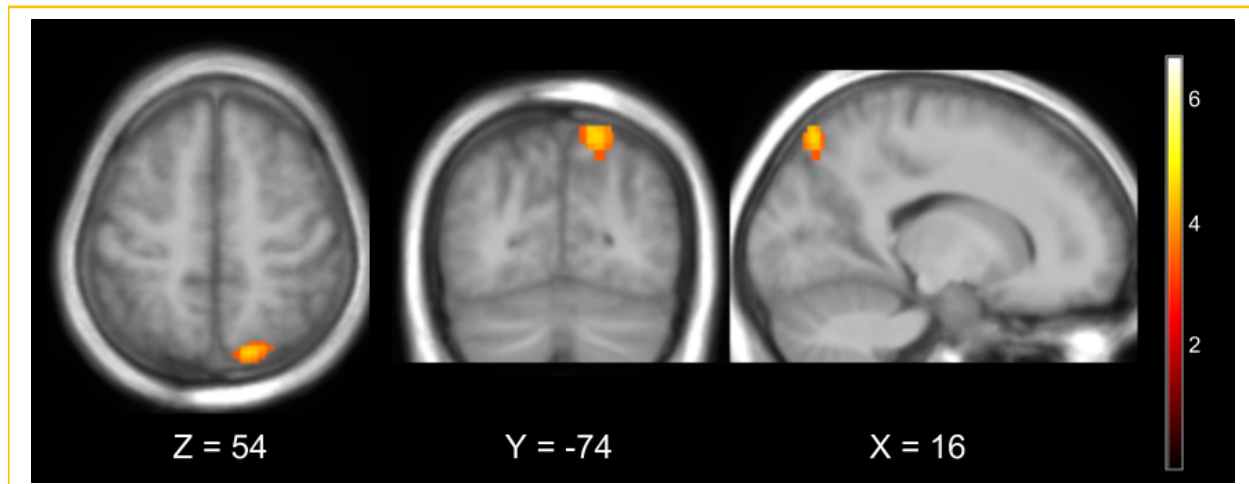

Figure 6: Group difference : BI\_DIM > UNI\_DIM thresholded at  $p < 0.001$  uncorrected. The BI\_DIM activated more the right superior parietal lobule (BA7).

Friedman tests between MI\_pre,  $\overline{NF}$  and MI\_post were significant for posthoc EEG in the BI\_DIM group ( $p = 0.045$ ,  $\chi^2(2, 10) = 6.2$ ) and for posthoc fMRI in the BI\_DIM group ( $p = 0.0136$ ,  $\chi^2(2, 10) = 8.6$ ).

Wilcoxon signed rank tests between MI\_pre and maxNF were significant for: on-line EEG ( $p = 0.0098$ , signedrank = 52) and online fMRI ( $p = 0.0195$ , signedrank = 50) in the UNI\_DIM group; posthoc EEG ( $p = 0.0020$ , signedrank = 55) and posthoc fMRI ( $p = 0.0137$ , signedrank = 51) in the UNI\_DIM group; and for posthoc EEG ( $p = 0.0020$ , signedrank = 55) and posthoc fMRI ( $p = 0.0020$ , signedrank = 55) in the BI\_DIM group. Wilcoxon signed rank tests between MI\_pre and NF were significant for: posthoc EEG ( $p = 0.0195$ , signedrank = 50) in the UNI\_DIM group; posthoc EEG ( $p = 0.0273$ , signedrank = 49) and posthoc fMRI ( $p = 0.0039$ , signedrank = 54) in the BI\_DIM group. Results are summarized in figure 8 and figure 9. During the NF runs the fMRI PSC in the online ROI was significantly higher in the UNI\_DIM group than in the BI\_DIM group (Wilcoxon:  $z = 3.0615$ , ranksum = 146,  $p = 0.0022$ ).

Questionnaire : In the BI\_DIM group 5 participants out of 10 found that the blocks were too short (against one who found them too long in the UNI\_DIM group), and 5 participants out of 10 found that the feedback was not a good indicator of their motor imagery (against 0 in the UNI\_DIM group).

## 4 Discussion

In the present study we introduced and evaluated two integrated feedback strategies for EEG-fMRI-NF: a 2D plot in which EEG and fMRI are mapped onto each dimension, and a 1D gauge that integrates both information even more by merging them into one. In contrast to representing the EEG and fMRI features with two separate feedbacks, these integrated feedback strategies represent both information in a single feedback with a single NF target. They have the advantage of relieving the cognitive load of the subject,

| Regions                                                                                                                                                                                                                                            | Side | k    | Peak T | X   | Y   | Z  |
|----------------------------------------------------------------------------------------------------------------------------------------------------------------------------------------------------------------------------------------------------|------|------|--------|-----|-----|----|
| <b>BI_DIM (n=10)</b>                                                                                                                                                                                                                               |      |      |        |     |     |    |
| <b>{NF1, NF2, NF3} &gt; 0 (p &lt; 0.05, k ≥ 10, FWE corrected)</b>                                                                                                                                                                                 |      |      |        |     |     |    |
| Precentral gyrus, Superior frontal gyrus (dorsolateral), Middle frontal gyrus (lateral part), Supplementary motor area                                                                                                                             | L    | 197  | 6.46   | -20 | -8  | 54 |
| Superior occipital, Superior parietal lobule, Precuneus                                                                                                                                                                                            | R    | 70   | 6.45   | 16  | -72 | 54 |
| Postcentral gyrus, Superior parietal lobule, Inferior parietal lobule, Precuneus                                                                                                                                                                   | R    | 61   | 6.08   | 26  | -54 | 58 |
| Precentral gyrus                                                                                                                                                                                                                                   | L    | 39   | 6.35   | -56 | 6   | 42 |
| Superior parietal lobule, Inferior parietal lobule                                                                                                                                                                                                 | L    | 23   | 5.63   | -26 | -58 | 62 |
| Precentral gyrus, Pars opercularis                                                                                                                                                                                                                 | R    | 21   | 6.01   | 60  | 8   | 30 |
| Middle occipital                                                                                                                                                                                                                                   | R    | 15   | 5.68   | 34  | -82 | 18 |
| Inferior parietal lobule                                                                                                                                                                                                                           | L    | 14   | 5.68   | -32 | -44 | 46 |
| <b>{NF1, NF2, NF3} &lt; 0 (p &lt; 0.05, k ≥ 10, FWE corrected)</b>                                                                                                                                                                                 |      |      |        |     |     |    |
| Precentral gyrus, Postcentral gyrus                                                                                                                                                                                                                | R    | 25   | 6.38   | 38  | -30 | 70 |
| Inferior parietal lobule                                                                                                                                                                                                                           | L    | 10   | 5.79   | -34 | -80 | 42 |
| <b>UNI_DIM (n=10)</b>                                                                                                                                                                                                                              |      |      |        |     |     |    |
| <b>{NF1, NF2, NF3} &gt; 0 (p &lt; 0.05, k ≥ 10, FWE corrected)</b>                                                                                                                                                                                 |      |      |        |     |     |    |
| R superior frontal gyrus (dorsolateral), L/R supplementary motor area                                                                                                                                                                              | L/R  | 432  | 8.24   | 4   | 6   | 58 |
| Precentral gyrus, Superior frontal gyrus (dorsolateral), Middle frontal gyrus (lateral part), Pars opercularis                                                                                                                                     | L    | 389  | 7.83   | -36 | -8  | 62 |
| Precentral gyrus, Superior frontal gyrus (dorsolateral), Middle frontal gyrus (lateral part), Pars opercularis                                                                                                                                     | R    | 325  | 9.07   | 36  | -2  | 50 |
| Postcentral gyrus, Inferior parietal lobule, Supramarginal gyrus                                                                                                                                                                                   | L    | 199  | 8.13   | -62 | -22 | 30 |
| Postcentral gyrus, Supramarginal gyrus, Superior temporal gyrus                                                                                                                                                                                    | R    | 115  | 6.81   | 62  | -34 | 22 |
| Postcentral gyrus, Superior parietal lobule, Inferior parietal lobule                                                                                                                                                                              | L    | 95   | 7.48   | -38 | -48 | 54 |
| Superior parietal lobule, Precuneus                                                                                                                                                                                                                | R    | 25   | 6.6    | 18  | -62 | 50 |
| <b>{NF1, NF2, NF3} &lt; 0 (p &lt; 0.05, k ≥ 10, FWE corrected)</b>                                                                                                                                                                                 |      |      |        |     |     |    |
| Angular gyrus                                                                                                                                                                                                                                      | R    | 18   | 7.01   | 44  | -70 | 50 |
| <b>BI_DIM &gt; UNI_DIM</b>                                                                                                                                                                                                                         |      |      |        |     |     |    |
| <b>{NF1, NF2, NF3} &gt; 0 (p &lt; 0.001, k ≥ 10, uncorrected)</b>                                                                                                                                                                                  |      |      |        |     |     |    |
| Superior parietal lobule                                                                                                                                                                                                                           | R    | 84   | 4.65   | 16  | -74 | 54 |
| <b>BI_DIM and UNI_DIM (n=20)</b>                                                                                                                                                                                                                   |      |      |        |     |     |    |
| <b>{NF1, NF2, NF3} &gt; 0 (p &lt; 0.05, k ≥ 10, FWE corrected)</b>                                                                                                                                                                                 |      |      |        |     |     |    |
| L/R precentral gyrus, L/R superior frontal gyrus (dorsolateral), L/R middle frontal gyrus (lateral part), L/R Pars opercularis, L/R pars triangularis, L/R supplementary motor area, L middle cingulate, L postcentral gyrus, L paracentral lobule | L/R  | 3368 | 9.82   | -58 | 6   | 34 |
| Postcentral gyrus, Superior parietal lobule, Inferior parietal lobule, Supramarginal gyrus, Precuneus                                                                                                                                              | L    | 1740 | 8.61   | -34 | -46 | 54 |
| Superior occipital, Middle occipital, Postcentral gyrus, Superior parietal lobule, Inferior parietal lobule, Supramarginal gyrus, Angular gyrus, Precuneus, Superior temporal gyrus                                                                | R    | 1736 | 8.12   | 18  | -66 | 50 |
| <b>{NF1, NF2, NF3} &lt; 0 (p &lt; 0.05, k ≥ 10, FWE corrected)</b>                                                                                                                                                                                 |      |      |        |     |     |    |
| Superior occipital, Middle occipital, Superior parietal lobule, Inferior parietal lobule, Angular gyrus                                                                                                                                            | L    | 192  | 7.45   | -36 | -80 | 42 |
| L/R posterior cingulate gyrus, L cuneus, L/R precuneus                                                                                                                                                                                             | L/R  | 133  | 5.63   | 2   | -62 | 30 |
| Middle occipital, Angular gyrus                                                                                                                                                                                                                    | R    | 104  | 7.53   | 48  | -70 | 46 |
| L cuneus, R cuneus                                                                                                                                                                                                                                 | L/R  | 88   | 5.66   | 12  | -80 | 30 |
| Precentral gyrus, Postcentral gyrus                                                                                                                                                                                                                | R    | 57   | 6.54   | 46  | -26 | 62 |
| Precentral gyrus, Postcentral gyrus, Paracentral lobule                                                                                                                                                                                            | R    | 47   | 5.69   | 18  | -32 | 70 |

Figure 7: Anatomical labels, hemisphere, cluster size, peak t-value and MNI coordinates of significant group activation/deactivation clusters.

to represent the task as a single regulation task instead of two and to allow to define a NF target characterized by the state of both signals.

**Online and posthoc performance** Overall both strategies allowed participants to up-regulate MI-related EEG and fMRI patterns, as demonstrated by the higher posthoc EEG and fMRI activation levels during maxNF/NF compared to MI\_pre (see Figure 9). The improvement was even more significant on posthoc fMRI in the BI\_DIM group.

Online fMRI activation level during NF were significantly higher in the UNI\_DIM group than in the BI\_DIM group (figure 8) which showed particularly high variability among participants and NF runs. Though the UNI\_DIM worked better than the BI\_DIM regarding the regulation of the initial (online) targets, their performance was moderate. Indeed, the online activation level improvement with respect to MI\_pre was only significant for the UNI\_DIM group in the maxNF run (see Figure 8). The loss of performance



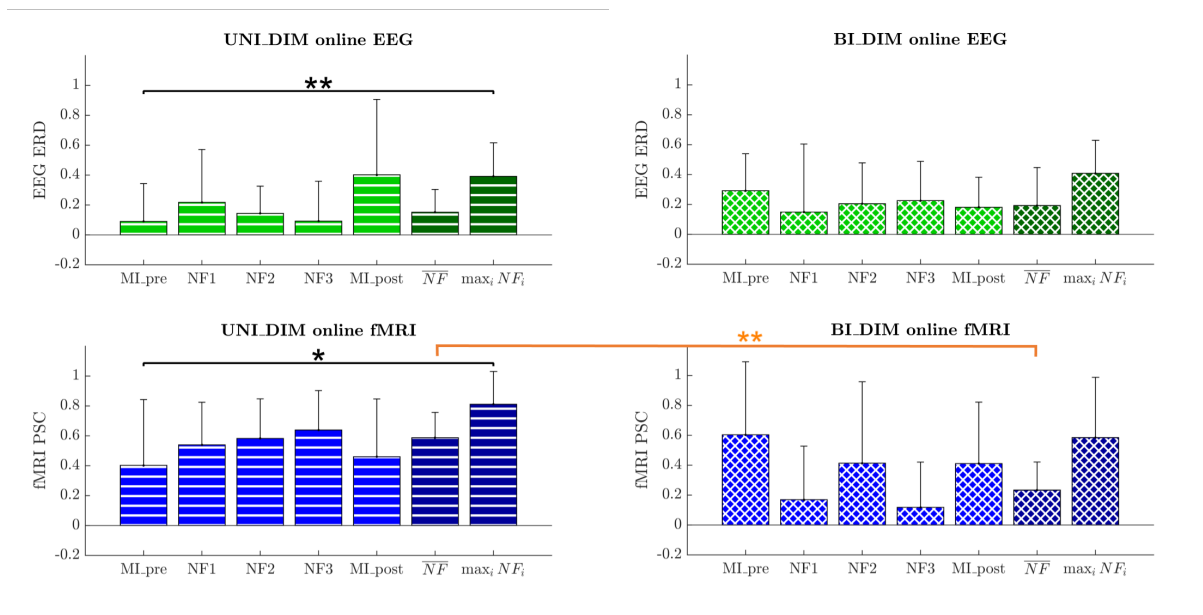

Figure 8: Group means (EEG/fMRI, online, z-scored) on each run with standard deviation + significance of Wilcoxon tests

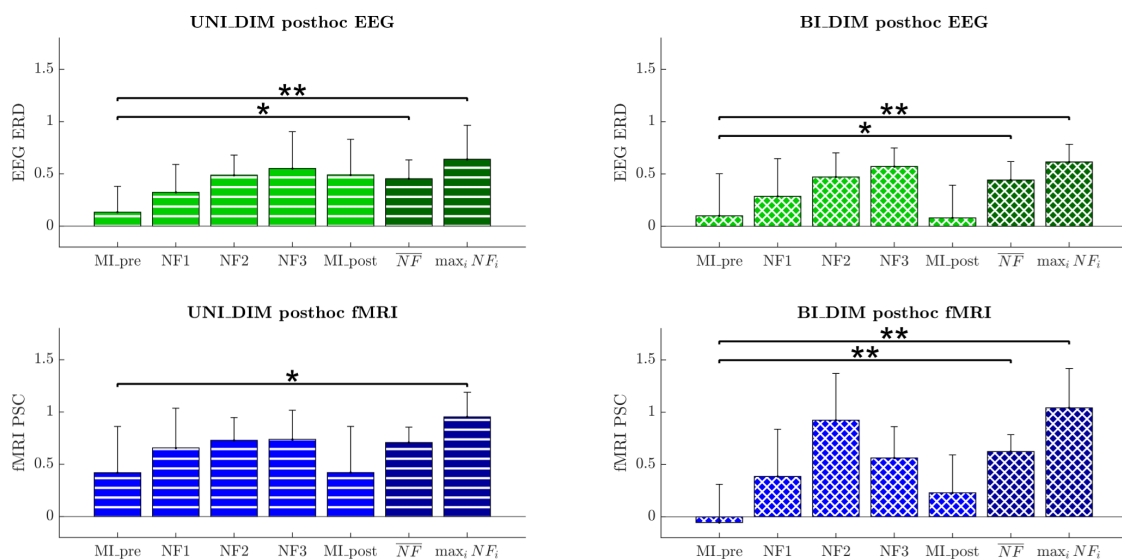

Figure 9: Group means (EEG/fMRI, posthoc, z-scored) on each run with standard deviation + significance of Wilcoxon tests.

on the online fMRI activation level during NF with a bi-dimensional feedback was also observed in our previous study (Perronnet, Lécuyer, Mano, et al., 2017). Our new results thus highlight the fact that the bi-dimensional feedback is harder to control than the uni-dimensional feedback and that this affects online EEG and fMRI activation levels differently, at least on a single-session basis. We hypothesize that this could be due to the higher complexity of the bi-dimensional feedback. This complexity comes from the fact that it has two degrees of freedom with slightly different update rates (4 Hz and 1 Hz), whose relationship is non-trivial, and one of which is delayed from the other. Subjects therefore need more time to get acquainted with this more complex feedback. By

allowing subjects to discriminate between the information coming from EEG and fMRI, the bi-dimensional feedback leads subjects to make interpretations about EEG and fMRI contingency. They might be able to try different strategies and analyze how they affect both dimensions. In particular it can be disturbing when both dimensions seem to present inconsistencies. This could explain why half of the participants in the BI\_DIM group reported that the feedback was not a good indicator of their motor imagery. The hypothesis that the bi-dimensional feedback is more complex and therefore requires more habituation time is supported by the fact that half of the participants in the BI\_DIM group reported they found the training blocks too short (20 seconds) and by participants comments from the BI\_DIM group : *"it is hard to know which mental process will favor EEG activity and which one will favor fMRI activity", "the discrepancy between EEG and fMRI did not help to control the feedback given the small number of trials", "task blocks could have been longer to allow to test different strategies and observe their effect"*. The fact that the loss of performance affected more fMRI than EEG could mean that they focused more on regulating the EEG because feedback from EEG is immediate while feedback from fMRI is delayed. Additionally this could also be due to the fact that the feedback was moving 4 times faster in the EEG dimension.

Looking at the opposite trend between the online and posthoc activation levels of both groups (i.e. higher online fMRI activation levels for UNI\_DIM and higher posthoc fMRI activation levels for BI\_DIM) suggests that participants in the BI\_DIM group could have moved further away from their initial MI\_pre calibration pattern than participants from the UNI\_DIM group. Though the 2D feedback is more complex, it seems to encourage participants to explore mental strategies, interpret their effects on the two feedback dimensions in order to find a strategy that allows to control both dimensions equitably. Training block length might benefit from being adapted to the feedback strategy, with shorter block for the 1D feedback and longer block for the 2D feedback to allow for the exploration and interpretation of inner strategies. The 1D strategy could be well suited during earlier phases of a NF program as it is easier to control, while the 2D strategy could prove valuable in the longer term to reach more specific self-regulation.

**Group distribution across the 3 NF runs** Looking at the distribution of online mean activation levels (figure 11) over the three NF runs shows how the two group populations evolved over the course of the training. In the first run, both populations were rather widespread and distributed along the EEG axis which suggests that participants started by exploring EEG. Participants from the BI\_DIM group were also slightly distributed along the fMRI axis in the first NF run. In the second NF run, both populations were spread along the fMRI axis, which suggests that participants explored fMRI while keeping EEG at a mean level. In the third run, both populations are spread along the central (0.5) isoline, which suggests that participants adopted a strategy that minimized the errors in both dimensions. Overall the progression look similar in both group but the BI\_DIM population is more widespread than UNI\_DIM in NF1 and NF2. This higher variability might once again be due to the higher complexity of the feedback to which participants need to get used.

Accurate assessments of strategies, motivation, cognitive state but also of personality traits (such as the sense of agency ...) (Jeunet, Lotte, et al., 2018; Jeunet, N’Kaoua, et al., 2015) are key to interpreting the learning curve and the effects of neurofeedback. Our questionnaire inquiring about strategies, fatigue, motivation, perceived performance, and confidence in the feedback gave us valuable qualitative insights about how subjects in

the BI\_DIM group reacted to the complexity of the feedback. In future experiments, especially some involving multiple NF sessions, we plan to use a more thorough questionnaire incorporating behavioral and personality aspects.

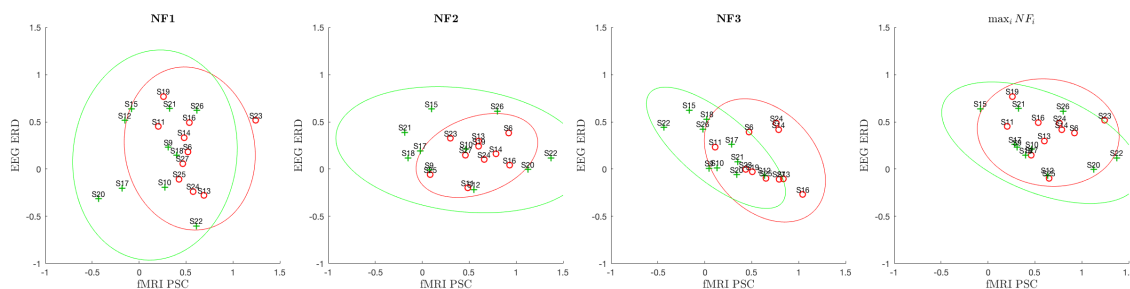

Figure 10: Individual means (online EEG ERD and fMRI PSC, z-scored) of all participants during NF runs. Individuals from the UNL\_DIM group are shown in red. Individuals from the BI\_DIM group are shown in green. We can see how the groups evolved over the NF runs.

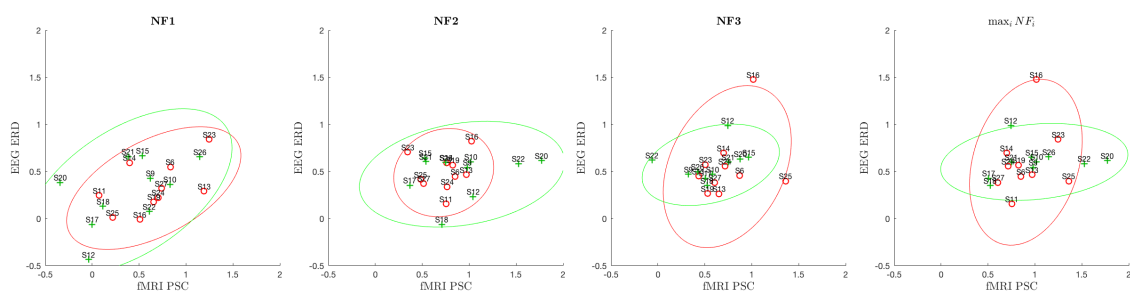

Figure 11: Individual means (posthoc EEG ERD and fMRI PSC, z-scored) of all participants during NF runs. Individuals from the UNL\_DIM group are shown in red. Individuals from the BI\_DIM group are shown in green. We can see how the groups evolved over the NF runs.

**Activation maps** BOLD activation maps show that during NF both groups significantly activated regions from the motor imagery network including premotor areas and posterior parietal areas (figures 5 and 4), as well as regions that have been shown to be consistently active during NF (Emmert, Kopel, Sulzer, et al., 2016) (mid-cingulate (ACC), supra-marginal (temporo-parietal), dlPFC, premotor,). Subcortical and cerebellar regions activations could not be identified as they were out of the field of view. The BI\_DIM group showed more activations ( $p < 0.001$ , uncorrected) than the UNL\_DIM group in the right superior parietal lobule (BA 7). The SPL plays an essential role in many cognitive, perceptive, and motor-related processes (Culham and Kanwisher, 2001; Wang et al., 2015). In particular it has been reported to be activated both during motor execution (ME) and MI (Confalonieri et al., 2012; Fleming, Stinear, and Byblow, 2010; Héту et al., 2013; Lotze and Halsband, 2006; Raffin et al., 2012; Sharma and Baron, 2013; Solodkin et al., 2004) though greater activation has been observed during MI than ME (Gerardin et al., 2000; Hanakawa et al., 2002). More specifically, the SPL is known to play a role in guiding motor activity in relation to spatial information (Buneo and

Andersen, 2006; Culham and Kanwisher, 2001; Wang et al., 2015) and to be crucial in the generation of mental motor representations (Sirigu et al., 1996). Several studies have demonstrated that impairments to the parietal cortex reduced MI ability (Danckert et al., 2002; McInnes, Friesen, and Boe, 2016; Sirigu et al., 1996). A meta-analysis recently conducted to determine which neurologic disorders/lesions impair or restrict MI ability showed that patients with parietal lobe damage were most impaired (McInnes, Friesen, and Boe, 2016). In MI, the SPL is thought to play a role in facilitating the planning and coordination of imagined movements and/or in indirectly inhibiting M1 through its connection with the SMA (Kasess et al., 2008; McInnes, Friesen, and Boe, 2016; Solodkin et al., 2004). Activations in the SPL have been shown to be more active during visual imagery than during kinaesthetic imagery (Guillot et al., 2009). However we found no significant activation in the occipital regions as would be expected during visual imagery. Therefore it is unlikely that the SPL activation would indicate that participants in the BI\_DIM performed a motor imagery that would have been more visual than kinesthetic. The superior parietal cortex has also been demonstrated to be active during generalized neurofeedback when feedback is presented visually (Emmert, Kopel, Sulzer, et al., 2016; Ninaus et al., 2013; Sitaram et al., 2016). However the fact that the SPL was more significantly active in the BI\_DIM group than in the UNI\_DIM group suggest that it is more than a generalized NF effect. This activation could result from both the overlap of the motor imagery task and the self-regulation process (Sitaram et al., 2016), both of which could be more intense under the bi-dimensional condition.

Though not shown at the group comparison level, the overlay of UNI\_DIM activations and BI\_DIM activations (see Figure 5) shows that activations in the premotor areas were more widespread and bilateral in the UNI\_DIM group while they were more localized and lateralized to the left hemisphere in the BI\_DIM group. Also, the BI\_DIM group showed significant deactivations in the right primary motor cortex while the UNI\_DIM group did not. Overall, our results suggest that the bi-dimensional feedback triggered more specific activations than the uni-dimensional feedback.

**Defining bimodal NF targets** An integrated feedback allows to reward specific EEG/fMRI pair values and gives flexibility on the definition of the bimodal NF target, depending on the assumed spatio-temporal complementarity of the EEG and fMRI features. In this study, we designed the integrated strategies so that subjects would have to regulate both EEG and fMRI at the same time in order to reach the NF target. This assumes that such a state is possible. Indeed, neuro-vascular studies show that the electrophysiological and hemodynamic activity are correlated (Formaggio et al., 2010; Gonçalves et al., 2006; Murta et al., 2015; Ritter, Moosmann, and Villringer, 2009; Zaidi et al., 2015). For example, a study by (Zaidi et al., 2015) found significant correlations between hemodynamic peak-times of [HbO] and [HbR] signals with the underlying neural activity as measured with intra-cortical electrophysiology in primates, but not for their peak-amplitude. However depending on the type of tasks, the features, and the subjects, this might not necessarily be the case as illustrated in the study by De Vos et al. (De Vos et al., 2013) who reported no correlation between EEG and fMRI of a face processing task. Though it is hard to predict the degree of complementarity and redundancy of the EEG and fMRI features, it might be beneficial to take into consideration the degree of correlation of both features during the calibration phase.

Instead of defining the target on the "intersection" of the EEG and fMRI features, one could think of using a more laxist target defined by their "union", that is the target would

be reached when the EEG target or the fMRI target is reached. Such a target would be easier to reach, therefore potentially less specific, but it might be advantageous in order to limit the user frustration when used at the beginning of a protocol for example. Also the "union" strategy could be used in case the EEG and fMRI features would be hardly redundant. This could happen if the mental process being regulated was more complex and involved for example a cognitive regulation and an emotional regulation aspect each of which would be associated to one of the feature. Moreover in the "union" strategy, one could imagine displaying a secondary reward when the pair of EEG and fMRI features would reach the intersection without "penalizing" the subject when he/she does not control for both.

**Artifacts** The strong artifacts affecting the EEG in the MR environment and the difficulty to correct them in real-time constitute the main current limitation of EEG-fMRI-NF. Artifact removal for simultaneous EEG/fMRI traditionally consists of correcting the gradient and the BCG artifact with the AAS technique. However, this technique is likely to result in residual artifacts. In their pioneering work, Zotev et al. reported that residual MR and CB artifacts contributed up to 50% to the EEG feature after basic real-time signal processing (Zotev et al., 2014). Other sources of artifacts such as the helium pump (Nierhaus et al., 2013), the MR ventilation and motion (Fellner et al., 2016; Jansen et al., 2012) can also seriously affect the EEG data. As the helium pump artifact lies in the gamma range, in our particular case it should not affect our features of interest (alpha/beta). But altogether, these other sources of artifacts can limit the quality of the online EEG-nf signal and therefore also the potential of the EEG-fMRI-NF approach. However, the posthoc CSP patterns of the majority of the participants corresponded to motor imagery patterns which confirms that participants executed the task well and that the data was well pre-processed.

Alternative to AAS such as optimal basis sets (Niazy et al., 2005), independent component analysis (Mantini et al., 2007), reference-layer adaptive subtraction (Chowdhury et al., 2014) and carbon-wire loop (Abbott et al., 2014; Meer et al., 2016) have been proposed in order to better remove gradient and BCG artifacts or to remove the other types of artefacts. However only few methods are currently available for online use (Krishnaswamy et al., 2016; Mayeli et al., 2016; Meer et al., 2016; Steyrl et al., 2017; Wu et al., 2016). In future experiments, using such methods could allow to improve for the EEG-NF signal quality. Interestingly, a recent approach called automated EEG-assisted retrospective motion correction (aE-REMCOR) (Wong et al., 2016) uses the EEG data in order to estimate head motion and improve fMRI motion correction.

## 5 Conclusion

Our study introduces new integrated feedback strategies for EEG-fMRI-NF and demonstrates that during a motor imagery task they enable to regulate EEG and fMRI simultaneously, even when EEG and fMRI are integrated in a 1D feedback. Our results also suggest that the 1D feedback is easier to control on a single session while the 2D feedback encourages subjects to explore their strategies to find one that allows to control EEG and fMRI by recruiting more specific brain patterns. Altogether, our study paves the way to novel integrated EEG-fMRI-NF strategies for the development of flexible and effective NF paradigms that could prove useful for clinical applications.



## 6 Acknowledgements

This work has received a French government support granted to the CominLabs excellence laboratory and managed by the National Research Agency in the “Investing for the Future” program under reference ANR-10-LABX-07-01. It was also financed by Brittany region under HEMISFER project, and the National Research Agency with the REBEL project and grant ANR-15-CE23-0013-01. MRI data acquisition was supported by the Neurinfo MRI research facility from the University of Rennes I. Neurinfo is granted by the European Union (FEDER), the French State, the Brittany Council, Rennes.

## References

- Abbott, David F et al. (2014). “Constructing Carbon Fiber Motion-Detection Loops for Simultaneous EEG-fMRI.” In: *Frontiers in neurology* 5, p. 260. ISSN: 1664-2295. DOI: [10.3389/fneur.2014.00260](https://doi.org/10.3389/fneur.2014.00260).
- Alkoby, O. et al. (2017). *Can we predict who will respond to neurofeedback? A review of the inefficacy problem and existing predictors for successful eeg neurofeedback learning*. DOI: [10.1016/j.neuroscience.2016.12.050](https://doi.org/10.1016/j.neuroscience.2016.12.050).
- Allen, P J, Oliver Josephs, and Robert Turner (2000). “A method for removing imaging artifact from continuous EEG recorded during functional MRI.” In: *NeuroImage* 12.2, pp. 230–9. ISSN: 1053-8119. DOI: [10.1006/nimg.2000.0599](https://doi.org/10.1006/nimg.2000.0599).
- Allen, P J, G Polizzi, et al. (1998). “Identification of EEG events in the MR scanner: the problem of pulse artifact and a method for its subtraction.” In: *NeuroImage* 8.3, pp. 229–239. ISSN: 1053-8119. DOI: [10.1006/nimg.1998.0361](https://doi.org/10.1006/nimg.1998.0361).
- Arns, Martijn et al. (2017). “Neurofeedback: One of today’s techniques in psychiatry?” In: *L’Encéphale* 43.2, pp. 135–145. ISSN: 00137006. DOI: [10.1016/j.encep.2016.11.003](https://doi.org/10.1016/j.encep.2016.11.003).
- Baillet, Sylvain, John C. Mosher, and Richard M. Leahy (2001). “Electromagnetic brain mapping”. In: *IEEE Signal Processing Magazine* 18.6, pp. 14–30. ISSN: 10535888. DOI: [10.1109/79.962275](https://doi.org/10.1109/79.962275).
- Biessmann, Felix et al. (2011). “Analysis of Multimodal Neuroimaging Data”. In: *IEEE Reviews in Biomedical Engineering* 4, pp. 26–58. ISSN: 1937-3333. DOI: [10.1109/RBME.2011.2170675](https://doi.org/10.1109/RBME.2011.2170675).
- Birbaumer, Niels, Ander Ramos Murguialday, et al. (2009). *Chapter 8 Neurofeedback and Brain-Computer Interface. Clinical Applications*. DOI: [10.1016/S0074-7742\(09\)86008-X](https://doi.org/10.1016/S0074-7742(09)86008-X).
- Birbaumer, Niels, Sergio Ruiz, and Ranganatha Sitaram (2013). “Learned regulation of brain metabolism.” In: *Trends in cognitive sciences* 17.6, pp. 295–302. ISSN: 1879-307X. DOI: [10.1016/j.tics.2013.04.009](https://doi.org/10.1016/j.tics.2013.04.009).
- Blankertz, Benjamin et al. (2008). “Optimizing spatial filters for robust EEG single-trial analysis”. In: *IEEE Signal Processing Magazine* 25.1, pp. 41–56. ISSN: 10535888. DOI: [10.1109/MSP.2008.4408441](https://doi.org/10.1109/MSP.2008.4408441).
- Buch, Ethan et al. (2008). “Think to move: a neuromagnetic brain-computer interface (BCI) system for chronic stroke.” en. In: *Stroke; a journal of cerebral circulation* 39.3, pp. 910–7. ISSN: 1524-4628. DOI: [10.1161/STROKEAHA.107.505313](https://doi.org/10.1161/STROKEAHA.107.505313).
- Buneo, Christopher A. and Richard A. Andersen (2006). “The posterior parietal cortex: Sensorimotor interface for the planning and online control of visually guided movements”. In: *Neuropsychologia* 44.13, pp. 2594–2606. ISSN: 00283932. DOI: [10.1016/j.neuropsychologia.2005.10.011](https://doi.org/10.1016/j.neuropsychologia.2005.10.011).

- Chavarriaga, Ricardo et al. (2016). "Heading for new shores! Overcoming pitfalls in BCI design". In: *Brain-Computer Interfaces* 4.1-2, pp. 1–14. ISSN: 2326-263X. DOI: [10.1080/2326263X.2016.1263916](https://doi.org/10.1080/2326263X.2016.1263916).
- Chowdhury, Muhammad E.H. et al. (2014). "Reference layer artefact subtraction (RLAS): A novel method of minimizing EEG artefacts during simultaneous fMRI". In: *NeuroImage* 84, pp. 307–319. ISSN: 10538119. DOI: [10.1016/j.neuroimage.2013.08.039](https://doi.org/10.1016/j.neuroimage.2013.08.039).
- Confalonieri, Linda et al. (2012). "Brain Activation in Primary Motor and Somatosensory Cortices during Motor Imagery Correlates with Motor Imagery Ability in Stroke Patients". In: *ISRN Neurology* 2012, pp. 1–17. ISSN: 2090-5513. DOI: [10.5402/2012/613595](https://doi.org/10.5402/2012/613595).
- Culham, Jody C and Nancy G Kanwisher (2001). *Neuroimaging of cognitive functions in human parietal cortex*. DOI: [10.1016/S0959-4388\(00\)00191-4](https://doi.org/10.1016/S0959-4388(00)00191-4).
- Danckert, James et al. (2002). "Selective, Non-lateralized Impairment of Motor Imagery Following Right Parietal Damage". In: *Neurocase* 8.3, pp. 194–204. ISSN: 1355-4794. DOI: [10.1093/neucas/8.3.194](https://doi.org/10.1093/neucas/8.3.194).
- Darvishi, Sam et al. (2017). "Proprioceptive feedback facilitates motor imagery-related operant learning of sensorimotor beta-band modulation". In: *Frontiers in Neuroscience* 11.FEB, p. 60. ISSN: 1662453X. DOI: [10.3389/fnins.2017.00060](https://doi.org/10.3389/fnins.2017.00060).
- De Vos, Maarten et al. (2013). "The quest for single trial correlations in multimodal EEG-fMRI data". In: DOI: [10.0/Linux-x86\\_64](https://doi.org/10.0/Linux-x86_64).
- Emmert, Kirsten, Rotem Kopel, Yury Koush, et al. (2017). "Continuous vs. intermittent neurofeedback to regulate auditory cortex activity of tinnitus patients using real-time fMRI - A pilot study". In: *NeuroImage: Clinical* 14, pp. 97–104. ISSN: 22131582. DOI: [10.1016/j.nicl.2016.12.023](https://doi.org/10.1016/j.nicl.2016.12.023).
- Emmert, Kirsten, Rotem Kopel, James Sulzer, et al. (2016). "Meta-analysis of real-time fMRI neurofeedback studies using individual participant data: How is brain regulation mediated?" In: *NeuroImage* 124.Pt A, pp. 806–812. ISSN: 10959572. DOI: [10.1016/j.neuroimage.2015.09.042](https://doi.org/10.1016/j.neuroimage.2015.09.042).
- Fazli, Siamac, Sven Dahne, et al. (2015). *Learning From More Than One Data Source: Data Fusion Techniques for Sensorimotor Rhythm-Based Brain-Computer Interfaces*. DOI: [10.1109/JPROC.2015.2413993](https://doi.org/10.1109/JPROC.2015.2413993).
- Fazli, Siamac, Jan Mehnert, et al. (2012). "Enhanced performance by a hybrid NIRS-EEG brain computer interface". In: *NeuroImage* 59.1, pp. 519–529. ISSN: 10538119. DOI: [10.1016/j.neuroimage.2011.07.084](https://doi.org/10.1016/j.neuroimage.2011.07.084).
- Fellner, M. C. et al. (2016). "Spurious correlations in simultaneous EEG-fMRI driven by in-scanner movement". In: *NeuroImage* 133, pp. 354–366. ISSN: 10959572. DOI: [10.1016/j.neuroimage.2016.03.031](https://doi.org/10.1016/j.neuroimage.2016.03.031).
- Fleming, Melanie K., Cathy M. Stinear, and Winston D. Byblow (2010). "Bilateral parietal cortex function during motor imagery". In: *Experimental Brain Research* 201.3, pp. 499–508. ISSN: 00144819. DOI: [10.1007/s00221-009-2062-4](https://doi.org/10.1007/s00221-009-2062-4).
- Formaggio, Emanuela et al. (2010). "Brain oscillatory activity during motor imagery in EEG-fMRI coregistration". In: *Magnetic Resonance Imaging* 28.10, pp. 1403–1412. ISSN: 0730725X. DOI: [10.1016/j.mri.2010.06.030](https://doi.org/10.1016/j.mri.2010.06.030).
- Gaume, A. et al. (2016). "A psychoengineering paradigm for the neurocognitive mechanisms of biofeedback and neurofeedback". In: *Neuroscience & Biobehavioral Reviews*. ISSN: 01497634. DOI: [10.1016/j.neubiorev.2016.06.012](https://doi.org/10.1016/j.neubiorev.2016.06.012).

- Gerardin, E et al. (2000). “Partially overlapping neural networks for real and imagined hand movements.” In: *Cerebral cortex (New York, N.Y. : 1991)* 10.11, pp. 1093–104. ISSN: 1047-3211.
- Gonçalves, S. I. et al. (2006). “Correlating the alpha rhythm to BOLD using simultaneous EEG/fMRI: Inter-subject variability”. In: *NeuroImage* 30.1, pp. 203–213. ISSN: 10538119. DOI: [10.1016/j.neuroimage.2005.09.062](https://doi.org/10.1016/j.neuroimage.2005.09.062).
- Grech, Roberta et al. (2008). “Review on solving the inverse problem in EEG source analysis.” In: *Journal of neuroengineering and rehabilitation* 5, p. 25. ISSN: 1743-0003. DOI: [10.1186/1743-0003-5-25](https://doi.org/10.1186/1743-0003-5-25).
- Gruzelier, John H (2014). “EEG-neurofeedback for optimising performance. I: a review of cognitive and affective outcome in healthy participants.” In: *Neuroscience and biobehavioral reviews* 44, pp. 124–141. ISSN: 1873-7528. DOI: [10.1016/j.neubiorev.2013.09.015](https://doi.org/10.1016/j.neubiorev.2013.09.015).
- Guillot, Aymeric et al. (2009). “Brain activity during visual versus kinesthetic imagery: An fMRI study”. In: *Human Brain Mapping* 30.7, pp. 2157–2172. ISSN: 10659471. DOI: [10.1002/hbm.20658](https://doi.org/10.1002/hbm.20658).
- Hammond, DC (2011). “What is neurofeedback: An update”. In: *Journal of Neurotherapy* 15.4, pp. 305–336. ISSN: 1087-4208. DOI: [10.1080/10874208.2011.623090](https://doi.org/10.1080/10874208.2011.623090).
- Hanakawa, T. et al. (2002). “Functional Properties of Brain Areas Associated With Motor Execution and Imagery”. In: *Journal of Neurophysiology* 89.2, pp. 989–1002. ISSN: 0022-3077. DOI: [10.1152/jn.00132.2002](https://doi.org/10.1152/jn.00132.2002).
- Hétu, Sébastien et al. (2013). *The neural network of motor imagery: An ALE meta-analysis*. DOI: [10.1016/j.neubiorev.2013.03.017](https://doi.org/10.1016/j.neubiorev.2013.03.017).
- Huster, René J et al. (2014). “Brain-computer interfaces for EEG neurofeedback: peculiarities and solutions.” In: *International journal of psychophysiology : official journal of the International Organization of Psychophysiology* 91.1, pp. 36–45. ISSN: 1872-7697. DOI: [10.1016/j.ijpsycho.2013.08.011](https://doi.org/10.1016/j.ijpsycho.2013.08.011).
- Jansen, Marije et al. (2012). “Motion-related artefacts in EEG predict neuronally plausible patterns of activation in fMRI data”. In: *NeuroImage* 59.1, pp. 261–270. ISSN: 10538119. DOI: [10.1016/j.neuroimage.2011.06.094](https://doi.org/10.1016/j.neuroimage.2011.06.094).
- Jeunet, Camille, Fabien Lotte, et al. (2018). *Using Recent BCI Literature to Deepen our Understanding of Clinical Neurofeedback: A Short Review*. DOI: [10.1016/j.neuroscience.2018.03.013](https://doi.org/10.1016/j.neuroscience.2018.03.013).
- Jeunet, Camille, Bernard N’Kaoua, et al. (2015). “Predicting Mental Imagery-Based BCI Performance from Personality, Cognitive Profile and Neurophysiological Patterns”. In: *PLOS ONE* 10.12. Ed. by Doron Friedman, e0143962. ISSN: 1932-6203. DOI: [10.1371/journal.pone.0143962](https://doi.org/10.1371/journal.pone.0143962).
- Jeunet, Camille, Chi Vi, et al. (2015). “Continuous Tactile Feedback for Motor-Imagery Based Brain-Computer Interaction in a Multitasking Context”. In: Springer, Cham, pp. 488–505. DOI: [10.1007/978-3-319-22701-6\\_36](https://doi.org/10.1007/978-3-319-22701-6_36).
- Jorge, João, Wietske Van der Zwaag, and Patrícia Figueiredo (2014). “EEG-fMRI integration for the study of human brain function”. In: *NeuroImage* 102.P1, pp. 24–34. ISSN: 10959572. DOI: [10.1016/j.neuroimage.2013.05.114](https://doi.org/10.1016/j.neuroimage.2013.05.114).
- Kasess, Christian H. et al. (2008). “The suppressive influence of SMA on M1 in motor imagery revealed by fMRI and dynamic causal modeling”. In: *NeuroImage* 40.2, pp. 828–837. ISSN: 10538119. DOI: [10.1016/j.neuroimage.2007.11.040](https://doi.org/10.1016/j.neuroimage.2007.11.040).

- Kaufmann, Tobias and John Williamson (2011). “Visually multimodal vs. classic uni-modal feedback approach for smr-bcis: a comparison study”. In: *Int. J. ...* 13.2, pp. 80–81.
- Kleiner, M et al. (2007). “What’s new in Psychtoolbox-3”. In: *Perception* 36.14, p. 1. ISSN: 0301-0066.
- Kober, Silvia E, Matthias Witte, et al. (2013). “Learning to modulate one’s own brain activity: the effect of spontaneous mental strategies”. In: *Frontiers in Human Neuroscience* 7.October, p. 695. ISSN: 1662-5161. DOI: [10.3389/fnhum.2013.00695](https://doi.org/10.3389/fnhum.2013.00695).
- Kober, Silvia E, G. Wood, et al. (2014). “Near-infrared spectroscopy based neurofeedback training increases specific motor imagery related cortical activation compared to sham feedback”. In: *Biological Psychology* 95.1, pp. 21–30. ISSN: 03010511. DOI: [10.1016/j.biopsycho.2013.05.005](https://doi.org/10.1016/j.biopsycho.2013.05.005).
- Kopel, Rotem et al. (2016). “Distributed patterns of brain activity underlying real-time fMRI neurofeedback training”. In: *IEEE Transactions on Biomedical Engineering* 64.6, pp. 1–1. ISSN: 0018-9294. DOI: [10.1109/TBME.2016.2598818](https://doi.org/10.1109/TBME.2016.2598818).
- Krause, Florian et al. (2017). “Real-time fMRI-based self-regulation of brain activation across different visual feedback presentations”. In: *Brain-Computer Interfaces*, pp. 1–15. ISSN: 2326-263X. DOI: [10.1080/2326263X.2017.1307096](https://doi.org/10.1080/2326263X.2017.1307096).
- Krishnaswamy, Pavitra et al. (2016). “Reference-free removal of EEG-fMRI ballistocardiogram artifacts with harmonic regression”. In: *NeuroImage* 128, pp. 398–412. ISSN: 10959572. DOI: [10.1016/j.neuroimage.2015.06.088](https://doi.org/10.1016/j.neuroimage.2015.06.088).
- Lahat, Dana, Tülay Adalı, and Christian Jutten (2015). “Multimodal Data Fusion : An Overview of Methods , Challenges , and Prospects”. In: *Proceedings of the IEEE* 103.9, pp. 1449–1477. ISSN: 0018-9219. DOI: [10.1109/jproc.2015.2460697](https://doi.org/10.1109/jproc.2015.2460697).
- Lal, Thomas Navin et al. (2005). “A Brain Computer Interface with Online Feedback based on Magnetoencephalography”. In: *22Nd International Conference on Machine Learning*, pp. 465–472. DOI: [10.1145/1102351.1102410](https://doi.org/10.1145/1102351.1102410).
- Lotte, Fabien, Florian Larrue, and Christian Mühl (2013). “Flaws in current human training protocols for spontaneous Brain-Computer Interfaces: lessons learned from instructional design”. In: *Frontiers in Human Neuroscience* 7. ISSN: 1662-5161. DOI: [10.3389/fnhum.2013.00568](https://doi.org/10.3389/fnhum.2013.00568).
- Lotze, Martin and Ulrike Halsband (2006). “Motor imagery”. In: *Journal of Physiology Paris* 99.4-6, pp. 386–395. ISSN: 09284257. DOI: [10.1016/j.jphysparis.2006.03.012](https://doi.org/10.1016/j.jphysparis.2006.03.012).
- Mantini, D. et al. (2007). “Complete artifact removal for EEG recorded during continuous fMRI using independent component analysis”. In: *NeuroImage* 34.2, pp. 598–607. ISSN: 10538119. DOI: [10.1016/j.neuroimage.2006.09.037](https://doi.org/10.1016/j.neuroimage.2006.09.037).
- Maumet, Camille (2013). “From group to patient-specific analysis of brain function in arterial spin labelling and BOLD functional MRI”. PhD thesis.
- Mayeli, Ahmad et al. (2016). “Real-time EEG artifact correction during fMRI using ICA”. In: *Journal of Neuroscience Methods* 274, pp. 27–37. ISSN: 1872678X. DOI: [10.1016/j.jneumeth.2016.09.012](https://doi.org/10.1016/j.jneumeth.2016.09.012).
- McInnes, Kerry, Christopher Friesen, and Shaun Boe (2016). *Specific brain lesions impair explicit motor imagery ability: A systematic review of the evidence*. DOI: [10.1016/j.apmr.2015.07.012](https://doi.org/10.1016/j.apmr.2015.07.012).
- Meer, Johan N. van der et al. (2016). “Carbon-wire loop based artifact correction outperforms post-processing EEG/fMRI corrections-A validation of a real-time simultaneous



- EEG/fMRI correction method”. In: *NeuroImage* 125, pp. 880–894. ISSN: 10959572. DOI: [10.1016/j.neuroimage.2015.10.064](https://doi.org/10.1016/j.neuroimage.2015.10.064).
- Mihara, Masahito et al. (2012). “Neurofeedback using real-time near-infrared spectroscopy enhances motor imagery related cortical activation”. In: *PLoS ONE* 7.3. ISSN: 19326203. DOI: [10.1371/journal.pone.0032234](https://doi.org/10.1371/journal.pone.0032234).
- Murta, Teresa et al. (2015). “Electrophysiological correlates of the BOLD signal for EEG-informed fMRI”. In: *Human Brain Mapping* 36.1, pp. 391–414. ISSN: 10970193. DOI: [10.1002/hbm.22623](https://doi.org/10.1002/hbm.22623).
- Neuper, Christa et al. (2005). “Imagery of motor actions: Differential effects of kinesthetic and visual-motor mode of imagery in single-trial EEG”. In: *Cognitive Brain Research* 25.3, pp. 668–677. ISSN: 09266410. DOI: [10.1016/j.cogbrainres.2005.08.014](https://doi.org/10.1016/j.cogbrainres.2005.08.014).
- Niazy, R. K. et al. (2005). “Removal of fMRI environment artifacts from EEG data using optimal basis sets”. In: *NeuroImage* 28.3, pp. 720–737. ISSN: 10538119. DOI: [10.1016/j.neuroimage.2005.06.067](https://doi.org/10.1016/j.neuroimage.2005.06.067).
- Nierhaus, Till et al. (2013). “Internal ventilation system of MR scanners induces specific EEG artifact during simultaneous EEG-fMRI”. In: *NeuroImage* 74, pp. 70–76. ISSN: 10538119. DOI: [10.1016/j.neuroimage.2013.02.016](https://doi.org/10.1016/j.neuroimage.2013.02.016).
- Ninaus, Manuel et al. (2013). “Neural substrates of cognitive control under the belief of getting neurofeedback training.” In: *Frontiers in human neuroscience* 7.December, p. 914. ISSN: 1662-5161. DOI: [10.3389/fnhum.2013.00914](https://doi.org/10.3389/fnhum.2013.00914).
- Nunez, Paul L et al. (1997). *EEG coherency I: Statistics, reference electrode, volume conduction, Laplacians, cortical imaging, and interpretation at multiple scales*. DOI: [10.1016/S0013-4694\(97\)00066-7](https://doi.org/10.1016/S0013-4694(97)00066-7).
- Ono, Takashi et al. (2014). “Brain-computer interface with somatosensory feedback improves functional recovery from severe hemiplegia due to chronic stroke”. In: *Frontiers in Neuroengineering* 7, p. 19. ISSN: 1662-6443. DOI: [10.3389/fneng.2014.00019](https://doi.org/10.3389/fneng.2014.00019).
- Perronnet, Lorraine, Anatole Lécuyer, Fabien Lotte, et al. (2016). “Brain Training with Neurofeedback”. In: *Brain-Computer Interfaces 1: Foundations and Methods*. Ed. by Maureen Clerc, Laurent Bougrain, and Fabien Lotte. John Wiley & Sons, Inc., pp. 271–292. DOI: [10.1002/9781119144977.ch13](https://doi.org/10.1002/9781119144977.ch13).
- Perronnet, Lorraine, Anatole Lécuyer, Marsel Mano, et al. (2017). “Unimodal Versus Bimodal EEG-fMRI Neurofeedback of a Motor Imagery Task”. In: *Frontiers in Human Neuroscience* 11, p. 193. ISSN: 1662-5161. DOI: [10.3389/fnhum.2017.00193](https://doi.org/10.3389/fnhum.2017.00193).
- Pfurtscheller, Gert and Fernando Lopes da Silva (1999). *Event-related EEG/MEG synchronization and desynchronization: Basic principles*. DOI: [10.1016/S1388-2457\(99\)00141-8](https://doi.org/10.1016/S1388-2457(99)00141-8).
- Raffin, Estelle et al. (2012). “Disentangling motor execution from motor imagery with the phantom limb”. In: *Brain* 135.2, pp. 582–595. ISSN: 14602156. DOI: [10.1093/brain/awr337](https://doi.org/10.1093/brain/awr337).
- Ramoser, Herbert, Johannes Müller-Gerking, and Gert Pfurtscheller (2000). “Optimal spatial filtering of single trial EEG during imagined hand movement”. In: *IEEE Transactions on Rehabilitation Engineering* 8.4, pp. 441–446. ISSN: 10636528. DOI: [10.1109/86.895946](https://doi.org/10.1109/86.895946).
- Ritter, Petra, Matthias Moosmann, and Arno Villringer (2009). “Rolandic alpha and beta EEG rhythms’ strengths are inversely related to fMRI-BOLD signal in primary somatosensory and motor cortex”. In: *Human Brain Mapping* 30.4, pp. 1168–1187. ISSN: 10659471. DOI: [10.1002/hbm.20585](https://doi.org/10.1002/hbm.20585).



- Sepulveda, Pradyumna et al. (2016). “How feedback, motor imagery, and reward influence brain self-regulation using real-time fMRI”. In: *Human Brain Mapping* 37.9, pp. 3153–3171. ISSN: 10970193. DOI: [10.1002/hbm.23228](https://doi.org/10.1002/hbm.23228).
- Sharma, Nikhil and Jean-Claude Baron (2013). “Does motor imagery share neural networks with executed movement: a multivariate fMRI analysis”. In: *Frontiers in Human Neuroscience* 7, p. 564. ISSN: 1662-5161. DOI: [10.3389/fnhum.2013.00564](https://doi.org/10.3389/fnhum.2013.00564).
- Sirigu, A et al. (1996). “The Mental Representation of Hand Movements After Parietal Cortex Damage”. In: *Science* 273.5281, pp. 1564–1568. ISSN: 0036-8075. DOI: [10.1126/science.273.5281.1564](https://doi.org/10.1126/science.273.5281.1564).
- Sitaram, Ranganatha et al. (2016). “Closed-loop brain training: the science of neurofeedback”. In: *Nature Reviews Neuroscience* 18.2, pp. 86–100. ISSN: 1471-003X. DOI: [10.1038/nrn.2016.164](https://doi.org/10.1038/nrn.2016.164).
- Sollfrank, T. et al. (2016). “The effect of multimodal and enriched feedback on SMR-BCI performance”. In: *Clinical Neurophysiology* 127.1, pp. 490–498. ISSN: 13882457. DOI: [10.1016/j.clinph.2015.06.004](https://doi.org/10.1016/j.clinph.2015.06.004).
- Solodkin, Ana et al. (2004). “Fine modulation in network activation during motor execution and motor imagery”. In: *Cerebral Cortex* 14.11, pp. 1246–1255. ISSN: 10473211. DOI: [10.1093/cercor/bhh086](https://doi.org/10.1093/cercor/bhh086).
- Sorger, Bettina et al. (2016). *When the brain takes 'BOLD' steps: Real-time fMRI neurofeedback can further enhance the ability to gradually self-regulate regional brain activation*. DOI: [10.1016/j.neuroscience.2016.09.026](https://doi.org/10.1016/j.neuroscience.2016.09.026).
- Steyrl, David et al. (2017). “Reference layer adaptive filtering (RLAF) for EEG artifact reduction in simultaneous EEG-fMRI”. In: *Journal of Neural Engineering* 14.2, p. 026003. ISSN: 1741-2560. DOI: [10.1088/1741-2552/14/2/026003](https://doi.org/10.1088/1741-2552/14/2/026003).
- Stoeckel, L. E. et al. (2014). “Optimizing real time fMRI neurofeedback for therapeutic discovery and development”. In: *NeuroImage: Clinical* 5, pp. 245–255. ISSN: 22131582. DOI: [10.1016/j.nicl.2014.07.002](https://doi.org/10.1016/j.nicl.2014.07.002).
- Sudre, Gustavo et al. (2011). “RtMEG: A real-time software interface for magnetoencephalography”. In: *Computational Intelligence and Neuroscience* 2011. ISSN: 16875265. DOI: [10.1155/2011/327953](https://doi.org/10.1155/2011/327953).
- Sulzer, James et al. (2013). “Real-time fMRI neurofeedback: Progress and challenges”. In: *NeuroImage* 76, pp. 386–399. ISSN: 10538119. DOI: [10.1016/j.neuroimage.2013.03.033](https://doi.org/10.1016/j.neuroimage.2013.03.033).
- Sweller, John, Jeroen J. G. van Merriënboer, and Fred G. W. C. Paas (1998). “Cognitive Architecture and Instructional Design”. In: *Educational Psychology Review* 10.3, pp. 251–296. ISSN: 1040726X. DOI: [10.1023/A:1022193728205](https://doi.org/10.1023/A:1022193728205).
- Thibault, Robert T., Michael Lifshitz, Niels Birbaumer, et al. (2015). “Neurofeedback, self-regulation, and brain imaging: Clinical science and fad in the service of mental disorders”. In: *Psychotherapy and Psychosomatics* 84.4, pp. 193–207. ISSN: 14230348. DOI: [10.1159/000371714](https://doi.org/10.1159/000371714).
- Thibault, Robert T., Michael Lifshitz, and Amir Raz (2016). “The self-regulating brain and neurofeedback: Experimental science and clinical promise”. In: *Cortex* 74, pp. 247–261. ISSN: 19738102. DOI: [10.1016/j.cortex.2015.10.024](https://doi.org/10.1016/j.cortex.2015.10.024).
- Wander, Jeremiah D et al. (2013). “Distributed cortical adaptation during learning of a brain-computer interface task”. In: *Proceedings of the National Academy of Sciences* 110.26, pp. 10818–10823. ISSN: 0027-8424. DOI: [10.1073/pnas.1221127110](https://doi.org/10.1073/pnas.1221127110).

- Wang, Jiaojian et al. (2015). “Convergent functional architecture of the superior parietal lobule unraveled with multimodal neuroimaging approaches”. In: *Human Brain Mapping* 36.1, pp. 238–257. ISSN: 10970193. DOI: [10.1002/hbm.22626](https://doi.org/10.1002/hbm.22626).
- Wong, Chung Ki et al. (2016). “Automatic EEG-assisted retrospective motion correction for fMRI (aE-REMCOR)”. In: *NeuroImage* 129, pp. 133–147. ISSN: 10959572. DOI: [10.1016/j.neuroimage.2016.01.042](https://doi.org/10.1016/j.neuroimage.2016.01.042).
- Wu, Xia et al. (2016). “A real-time method to reduce ballistocardiogram artifacts from EEG during fMRI based on optimal basis sets (OBS)”. In: *Computer Methods and Programs in Biomedicine* 127, pp. 114–125. ISSN: 18727565. DOI: [10.1016/j.cmpb.2016.01.018](https://doi.org/10.1016/j.cmpb.2016.01.018).
- Zaidi, Ali Danish et al. (2015). “Simultaneous epidural functional near-infrared spectroscopy and cortical electrophysiology as a tool for studying local neurovascular coupling in primates”. In: *NeuroImage* 120, pp. 394–399. ISSN: 10959572. DOI: [10.1016/j.neuroimage.2015.07.019](https://doi.org/10.1016/j.neuroimage.2015.07.019).
- Zich, Catharina et al. (2015). “Real-time EEG feedback during simultaneous EEG-fMRI identifies the cortical signature of motor imagery”. In: *NeuroImage* 114, pp. 438–447. ISSN: 10959572. DOI: [10.1016/j.neuroimage.2015.04.020](https://doi.org/10.1016/j.neuroimage.2015.04.020).
- Zotev, Vadim et al. (2014). “Self-regulation of human brain activity using simultaneous real-time fMRI and EEG neurofeedback”. In: *NeuroImage* 85, pp. 985–995. ISSN: 10959572. DOI: [10.1016/j.neuroimage.2013.04.126](https://doi.org/10.1016/j.neuroimage.2013.04.126).
